# Supplementary material
Source: Springer Nature journal article supplement (https://www.springermedizin.de/resource/supplementary/12967_2008_372_MOESM1_ESM.pdf/9576328)

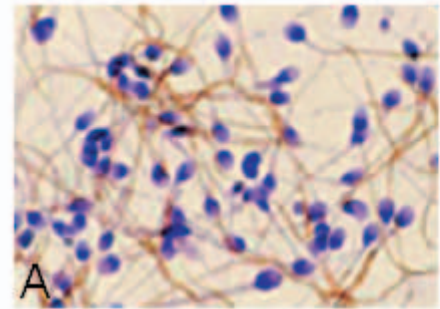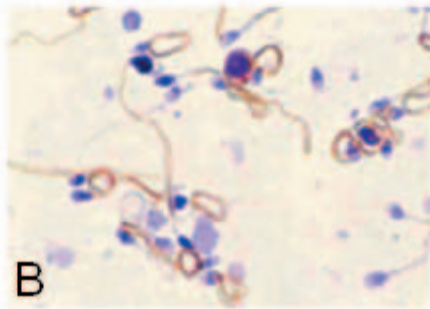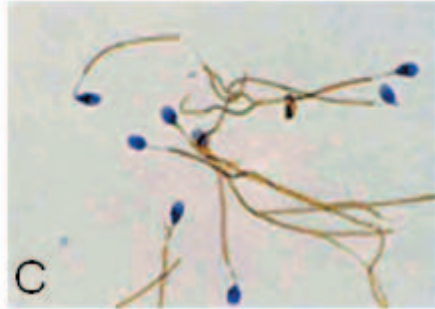

Supplement: MOESM1 [file 9576328]
